# Supplementary material for: HOX13-MEDIATED DBX2 REGULATION IN LIMBS SUGGESTS INTER-TAD SHARING OF ENHANCERS
Source: bioRxiv or medRxiv preprint supplement (doi:10.1101/2020.11.16.379412), 2020-11-17
Supplement: Supplementary file [file media-1.pdf]

# **HOX13-mediated *DBX2* regulation in limbs suggests inter-TAD sharing of enhancers**

By Leonardo Beccari et al.

This document contains:  
Supplementary figures 1-13,  
and associated references.

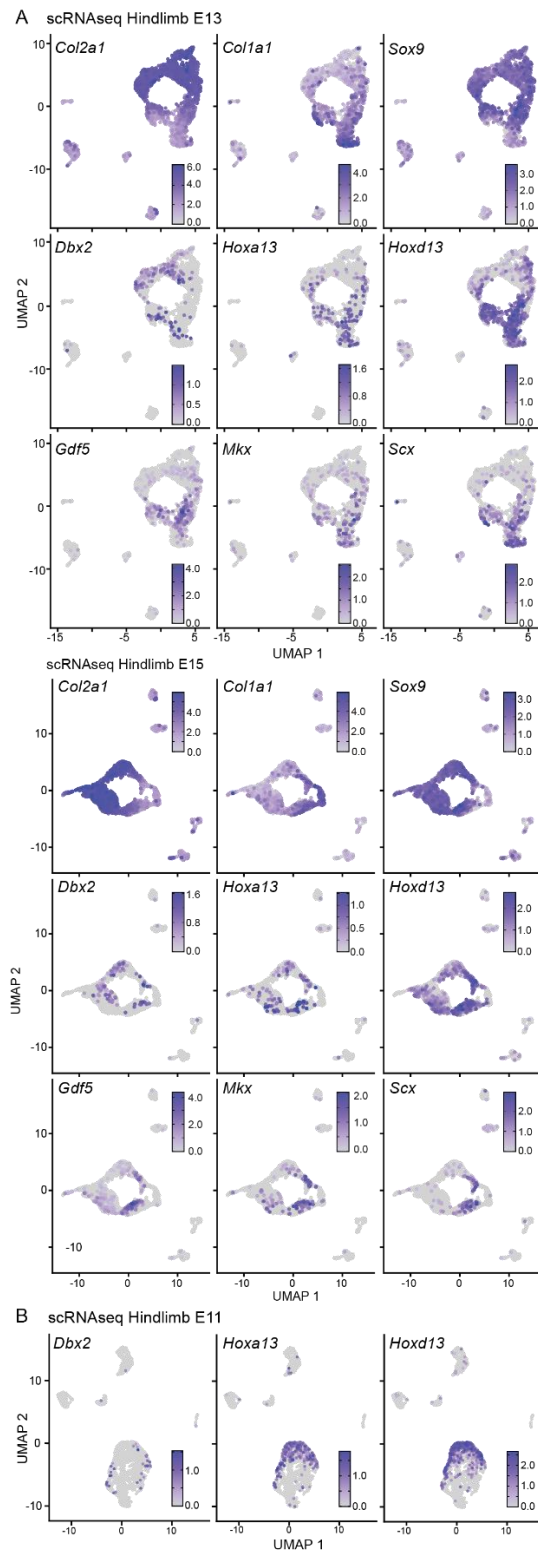

**Supplementary Figure S1. Single-cell RNaseq analysis of *Dbx2*+ cell populations in developing hindlimbs.** UMAP representations of the scRNAseq data from mouse E11 (A) E13 (B), and E15 (C) mouse hindlimbs<sup>1</sup> showing the expression of *Dbx2*, *Hoxa13* and *Hoxd13*, as well as of different joint (*Gdf5*) and tendons/ligaments (*Mlx*, *Scx*) markers<sup>2-4</sup>.

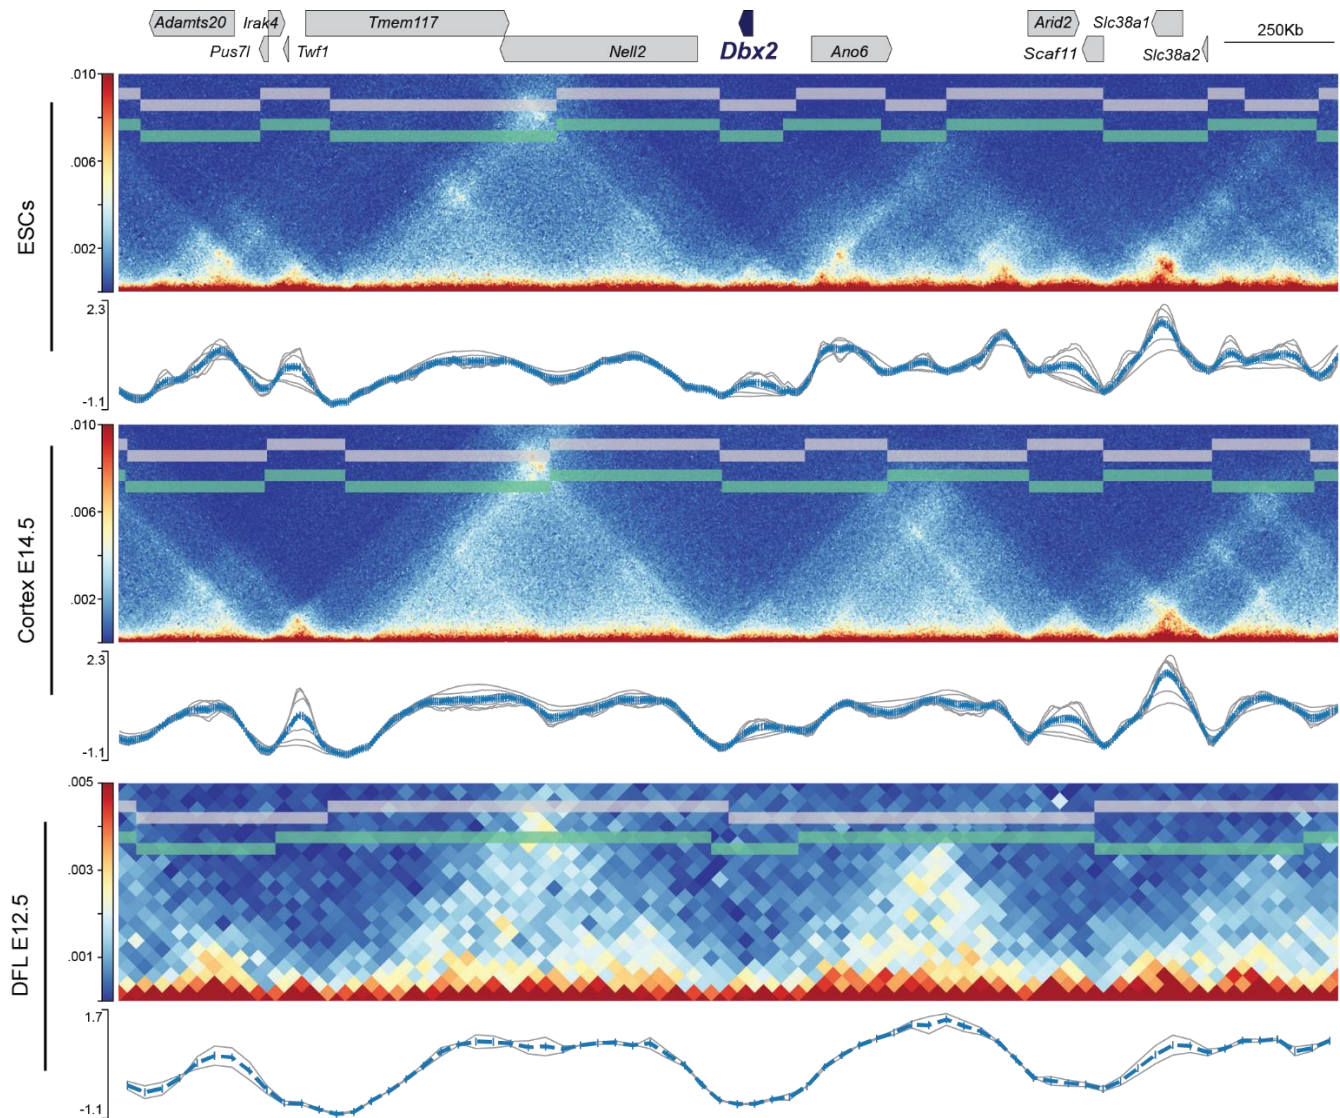

**Figure S2**

**Supplementary Figure S2. TAD organization around the *Dbx2* locus. A.** High resolution (5kb bin size) Hi-C map of the *Dbx2* genomic region in mouse ES cells (top) and E14 embryonic cortex (bottom), and graphs showing the TAD-separation score based on the HicFindTADs algorithm using different window size values (the curve calculated using standard parameters is displayed in gray and the average in blue). Data from <sup>5</sup>. **B.** 40kb resolution (bin size) Hi-C map of the *Dbx2* genomic region in E12 mouse

limb buds and graphs showing the TAD-separation score (as in **A**). Data from <sup>6</sup>. On top, the gene loci are represented in blue (*Dbx2*) or gray boxes for other genes. (A,B).

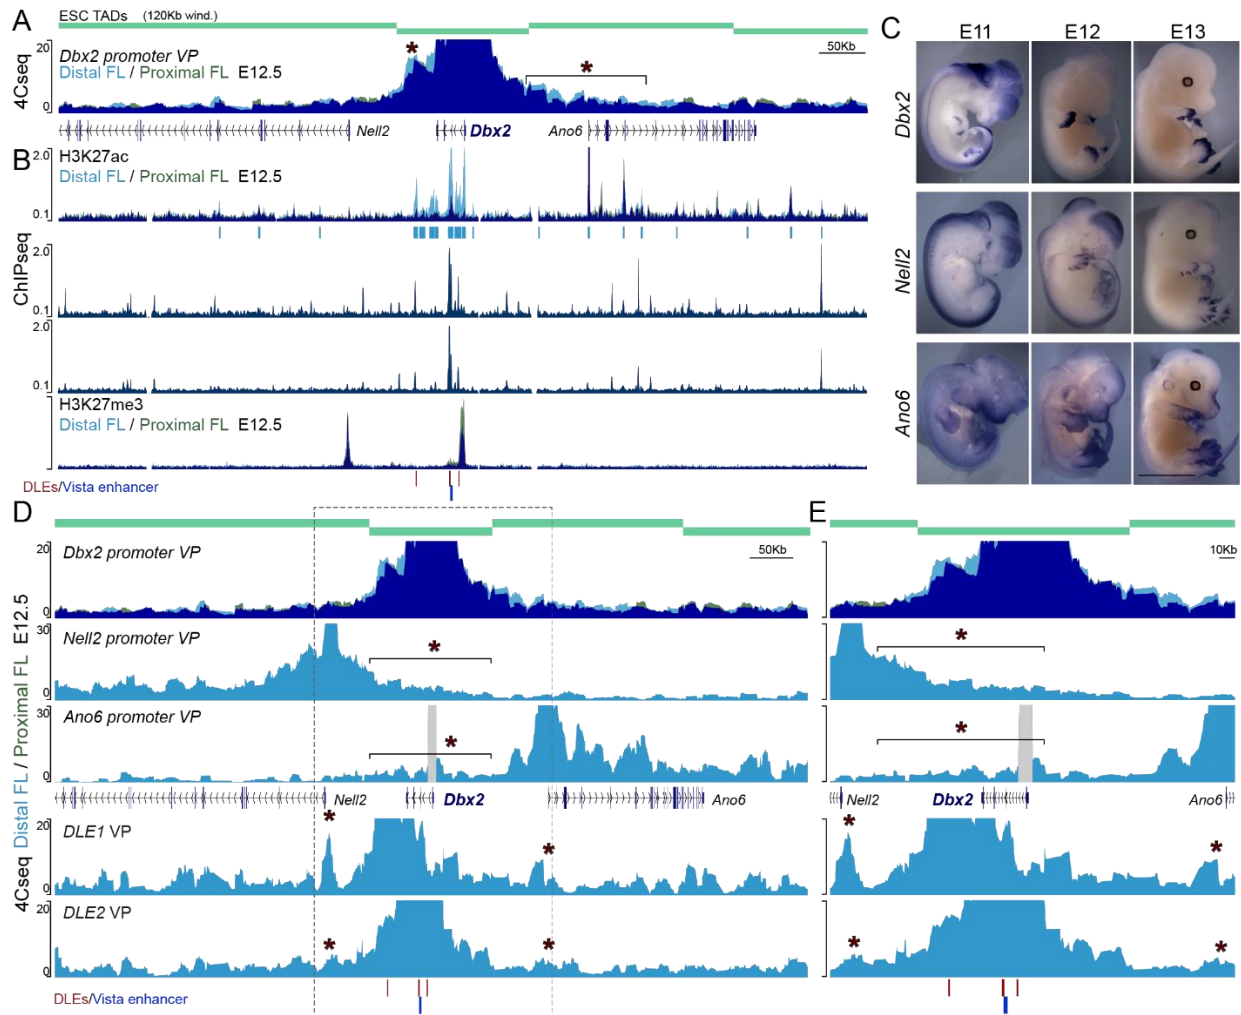

**Supplementary Figure S3. Characterization of *Dbx2* regulation in mouse developing limbs. A.** zoomed-in view of the 4Cseq interaction profiles of the *Dbx2* promoter (from Fig. 2A). Asterisks label the region displaying an increased contact frequency in the distal *versus* proximal limb bud. The TADs (data from <sup>5</sup>) are on top as light blue boxes **B.** ChIPseq analysis of H3K27ac and H3K27me3 marks in distal (light blue) and proximal (green) forelimbs, and HOXA13/HOXD13 binding profiles over the *Dbx2* genomic region. Data from <sup>7,8</sup>. Profile overlap in A and B is in dark blue. **C.** WISH analysis of *Dbx2*, *Nell2* and *Ano6* expression at different developmental stages. **D, E.** Zoomed-in views of the 4Cseq profiles showing the interactions of the *Dbx2*, *Ano6* and *Dbx2* promoters, as well as of the *DLE1* and *DLE2* sequences (see Fig. 6D) in distal (light blue) and proximal (green) forelimb buds (profile overlap is in dark blue). DLE1-3 elements are depicted with red boxes. The vista mm1571 element is in blue. Probably artefactual PCR product is depicted in gray. The region displayed in E is marked by a dashed rectangle in D.

## References

1. Kelly NH, Huynh NPT, Guilak F. Single cell RNA-sequencing reveals cellular heterogeneity and trajectories of lineage specification during murine embryonic limb development. *Matrix Biology*. 2020;89:1-10. doi:10.1016/j.matbio.2019.12.004
2. Huang B-L, Trofka A, Furusawa A, et al. An interdigit signalling centre instructs coordinate phalanx-joint formation governed by 5'Hoxd–Gli3 antagonism. *Nature Communications*. 2016;7(1):12903. doi:10.1038/ncomms12903
3. Liu W, Watson SS, Lan Y, et al. The Atypical Homeodomain Transcription Factor Mohawk Controls Tendon Morphogenesis. *Mol Cell Biol*. 2010;30(20):4797-4807. doi:10.1128/MCB.00207-10
4. Shwartz Y, Viukov S, Krief S, Zelzer E. Joint Development Involves a Continuous Influx of Gdf5-Positive Cells. *Cell Rep*. 2016;15(12):2577-2587. doi:10.1016/j.celrep.2016.05.055
5. Bonev B, Cohen NM, Szabo Q, et al. Multiscale 3D Genome Rewiring during Mouse Neural Development. *Cell*. 2017;171(3):557-572.e24. doi:10.1016/j.cell.2017.09.043
6. Rodriguez-Carballo E, Lopez-Delisle L, Zhan Y, et al. The HoxD cluster is a dynamic and resilient TAD boundary controlling the segregation of antagonistic regulatory landscapes. *Genes Dev*. 2017;31(22):2264-2281. doi:10.1101/gad.307769.117
7. Beccari L, Yakushiji-Kaminatsui N, Woltering JM, et al. A role for HOX13 proteins in the regulatory switch between TADs at the HoxD locus. *Genes Dev*. 2016;30(10):1172-1186. doi:10.1101/gad.281055.116
8. Sheth R, Barozzi I, Langlais D, et al. Distal Limb Patterning Requires Modulation of cis-Regulatory Activities by HOX13. *Cell Reports*. 2016;17(11):2913-2926. doi:10.1016/j.celrep.2016.11.039
